# Supplementary material for: Analysing the effect caused by increasing the molecular volume in M1-AChR receptor agonists and antagonists: a structural and computational study
Source: Royal Society of Chemistry journal article supplement (doi:10.1039/d3ra07380g), 2024-01-01

## Analysing the effect caused by increasing the molecular volume in M1-AChR receptor agonists and antagonists: A structural and computational study.

### Supplementary information

Figure-S1 Potential binding pockets in the muscarinic receptor.

| PDB  | Subtype M receptor | Ligand     | Drug score | Volume [ $\text{\AA}^3$ ] | Surface [ $\text{\AA}^2$ ] | Hydrophobicity ratio |
|------|--------------------|------------|------------|---------------------------|----------------------------|----------------------|
| 6OIJ | M1R                | Iperoxo    | 0.57       | 481.44                    | 416.59                     | 0.26                 |
| 6ZFZ | M1R                | 77-LH-28-1 | 0.71       | 853.36                    | 846.79                     | 0.34                 |
| 6WJC | M1R                | Atropine   | 0.81       | 1271.94                   | 1097.9                     | 0.33                 |
| 5CXV | M1R                | Tiotropium | 0.56       | 693.47                    | 568.59                     | 0.29                 |
| 4MQS | M2R                | Iperoxo    | 0.54       | 391.02                    | 274.65                     | 0.17                 |

Figure-S2 General data of agonists/antagonists at the human M1 muscarinic receptor.  $\Delta v$ , volume difference to the co-crystallized ligand, and experimental data of binding energies (kcal/mol) of selected molecule ligands known to target M1-AChR discovered in the Docking Screens.

| Agonist         |                          | Binding energy (kcal/mol) |                          |                         |                            |         |      | Antagonist |                      | Binding energy (kcal/mol) |                          |                          |                            |         |       |       |
|-----------------|--------------------------|---------------------------|--------------------------|-------------------------|----------------------------|---------|------|------------|----------------------|---------------------------|--------------------------|--------------------------|----------------------------|---------|-------|-------|
| Molecule        | pKi                      | MW (g/mol)                | Volume [Å <sup>3</sup> ] | $\Delta v$ 6OIJ Iperoxo | $\Delta v$ 6ZFZ 77-LH-28-1 | 6OIJ    | 6ZFZ | Molecule   | pKi                  | MW (g/mol)                | Volume [Å <sup>3</sup> ] | $\Delta v$ 6WJC Atropine | $\Delta v$ 5CXV Tiotropium | 6WJC    | 5CXV  |       |
| Partial agonist | AZD6088                  | 8.3                       | 393.55                   | 416.01                  | -195.31                    | -36.51  | -7.1 | -11.3      | QNB                  | 10.7                      | 338.43                   | 358.40                   | -49.25                     | 36.72   | -10.2 | -10.7 |
|                 | SPP1                     | 7.67                      | 427.57                   | 454.12                  | -233.42                    | -74.62  | -7.7 | -9.6       | tiotropium           | 10.34                     | 392.52                   | 395.12                   | -85.97                     | 0.00    | -8.8  | -9.8  |
|                 | xanomeline               | 7.3                       | 282.43                   | 299.97                  | -79.27                     | 79.53   | -5.8 | -8         | aclidinium           | 10.2                      | 484.66                   | 533.22                   | -224.07                    | -138.10 | -7.7  | -8    |
|                 | sabcomeline              | 6.7                       | 194.26                   | 207.12                  | 13.58                      | 172.38  | -4.9 | -6.7       | N-methyl scopolamine | 9.9                       | 318.39                   | 330.56                   | -21.41                     | 64.56   | -8.6  | -9.7  |
|                 | LY593093                 | 6.2                       | 508.62                   | 534.58                  | -313.88                    | -155.08 | -8.5 | -11.8      | glycopyrrolate       | 9.85                      | 318.44                   | 349.19                   | -40.04                     | 45.93   | -8.8  | -10.1 |
|                 | oxotremorine             | 5.75                      | 207.30                   | 235.81                  | -15.11                     | 143.69  | -8   | -7         | umeclidinium         | 9.8                       | 428.60                   | 475.09                   | -165.94                    | -79.97  | -9.6  | -9.4  |
|                 | (-)-aceclidine           | 5.4                       | 170.23                   | 181.6                   | 39.10                      | 197.90  | -5.4 | -6.5       | propantheline        | 9.7                       | 368.50                   | 407.36                   | -98.21                     | -12.24  | -9.6  | -10.2 |
|                 | pilocarpine              | 5.1                       | 209.27                   | 222.06                  | -1.36                      | 157.44  | -6.2 | -6.8       | ipratropium          | 9.55                      | 332.46                   | 365.56                   | -56.41                     | 29.56   | -9    | -9.4  |
|                 | McN-A-343                | 5                         | 281.76                   | 291.67                  | -70.97                     | 87.83   | -6.9 | -8         | revefenacin          | 9.4                       | 599.78                   | 636.06                   | -326.91                    | -240.94 | -8.6  | -10.4 |
|                 | milameline               | 4.8                       | 155.22                   | 178.32                  | 42.38                      | 201.18  | -5.9 | -5.8       | Telenzepine          | 9.4                       | 372.49                   | 372.03                   | -62.88                     | 23.09   | -8.1  | -7.8  |
|                 | HTL9936                  | 4.7                       | 366.53                   | 400.35                  | -179.65                    | -20.85  | -7.2 | -9.2       | 4-DAMP               | 9.3                       | 324.44                   | 362.79                   | -53.64                     | 32.33   | -9.5  | -10.8 |
|                 | (-)-YM796                | 4.55                      | 182.29                   | 213.06                  | 7.64                       | 166.44  | -4.1 | -6.9       | biperiden            | 9.3                       | 312.48                   | 354.08                   | -44.93                     | 41.04   | -9.4  | -10   |
| Full agonist    | NNC 11-1585              | 9.9                       | 326.44                   | 347.76                  | -127.06                    | 31.74   | -7.3 | -9.6       | atropine             | 9.1                       | 290.38                   | 309.15                   | 0.00                       | 85.97   | -8.3  | -8.9  |
|                 | 77-LH-28-1               | 8.7                       | 329.51                   | 379.5                   | -158.80                    | 0.00    | -5   | -10.1      | benzatropine         | 9                         | 308.45                   | 348.43                   | -39.28                     | 46.69   | -9.7  | -10.3 |
|                 | NNC 11-1607              | 8.6                       | 574.77                   | 564.73                  | -344.03                    | -185.23 | -8.5 | -11.9      | scopolamine          | 9                         | 304.37                   | 312.32                   | -3.17                      | 82.80   | -8.5  | -9.6  |
|                 | pentylthio-TZTP          | 8.6                       | 284.47                   | 292.15                  | -71.45                     | 87.35   | -5.6 | -7.4       | trihexyphenidyl      | 8.9                       | 302.48                   | 350.58                   | -41.43                     | 44.54   | -9.3  | -10   |
|                 | Iperoxo                  | 7.89                      | 197.26                   | 220.7                   | 0.00                       | 158.80  | -6.1 | -5.9       | dicyclomine          | 8.61                      | 310.50                   | 363.83                   | -54.68                     | 31.29   | -8.6  | -8.7  |
|                 | AC-260584                | 7.39                      | 348.46                   | 375.46                  | -154.76                    | 4.04    | -5.8 | -9.5       | tolterodine          | 8.5                       | 358.50                   | 387.97                   | -78.82                     | 7.15    | -8.7  | -9.6  |
|                 | GSK-1034702              | 6.5                       | 334.42                   | 339.04                  | -118.34                    | 40.46   | -6.1 | -9.6       | oxybutynin           | 8.45                      | 326.50                   | 406.22                   | -97.07                     | -11.10  | -8.5  | -8.7  |
|                 | aracaide propargyl ester | 6.4                       | 180.23                   | 202.15                  | 18.55                      | 177.35  | -6.6 | -6.3       | pirenzepine          | 8.15                      | 353.43                   | 360.26                   | -51.11                     | 34.86   | -8.5  | -8.6  |
|                 | AC-42                    | 6.2                       | 302.48                   | 359.37                  | -138.67                    | 20.13   | -7.1 | -9.4       | amitriptyline        | 7.8                       | 278.42                   | 327.15                   | -18.00                     | 67.97   | -10.1 | -10.3 |
|                 | arecoline                | 5.7                       | 156.21                   | 172.67                  | 48.03                      | 206.83  | -5.5 | -5.9       | solifenacin          | 7.8                       | 363.48                   | 387.35                   | -78.20                     | 7.77    | -8.4  | -8.9  |
|                 | oxotremorine-M           | 5.35                      | 195.29                   | 229.41                  | -8.71                      | 150.09  | -2.5 | -7         | VU0255035            | 7.8                       | 433.54                   | 394.36                   | -85.21                     | 0.76    | -8.9  | -8.7  |
|                 | cevimeline               | 5.3                       | 200.33                   | 204.46                  | 16.24                      | 175.04  | -6.7 | -6.1       | dosulepin            | 7.7                       | 296.46                   | 328.22                   | -19.07                     | 66.90   | -9.2  | -8.8  |
|                 | HTL9936                  | 4.7                       | 366.53                   | 400.35                  | -179.65                    | -20.85  | -7.2 | -9.2       | darifenacin          | 7.65                      | 427.57                   | 460.81                   | -151.66                    | -65.69  | -9.9  | -9.1  |
|                 | acetylcholine            | 4.6                       | 146.21                   | 171.6                   | 49.10                      | 207.90  | -4.5 | -5         | AFDX384              | 7.5                       | 480.66                   | 517.87                   | -208.72                    | -122.75 | -9    | -9.6  |
|                 | methylfurmethide         | 4.6                       | 154.23                   | 185.82                  | 34.88                      | 193.68  | -4.9 | -5.7       | AQ-RA 741            | 7.4                       | 464.63                   | 502.39                   | -193.24                    | -107.27 | -8.1  | -8.1  |
|                 | carbachol                | 4.25                      | 147.20                   | 163.41                  | 57.29                      | 216.09  | -4.4 | -4.9       | droxidopa            | 7.1                       | 213.19                   | 195.45                   | 113.70                     | 199.67  | -6.8  | -7    |
|                 | furtrethonium            | 4.1                       | 140.21                   | 167.71                  | 52.99                      | 211.79  | -4.2 | -5.3       | himbacine            | 6.9                       | 348.55                   | 393.32                   | -84.17                     | 1.80    | -7.4  | -7.4  |
|                 | bethanechol              | 4                         | 161.23                   | 181.39                  | 39.31                      | 198.11  | -4.3 | -5.4       | (S)-dimetindene      | 6.7                       | 293.43                   | 340.13                   | -30.98                     | 54.99   | -8.8  | -9.5  |

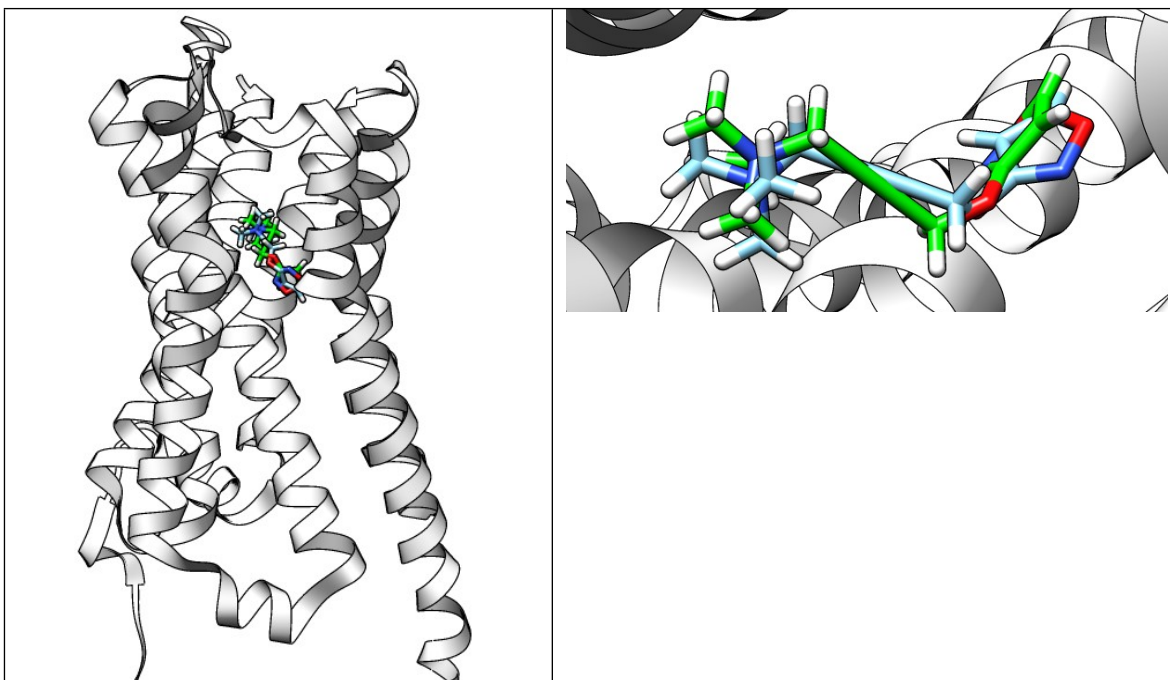

Figure-S3 Crystal structure of the M1AChR-iperoxo complex (PDB:6OIJ) with the overlapping ligand pose obtained from docking (RMSD=0.82 Å). The conformation obtained from the docking calculation is green, and the crystal conformation is cyan.

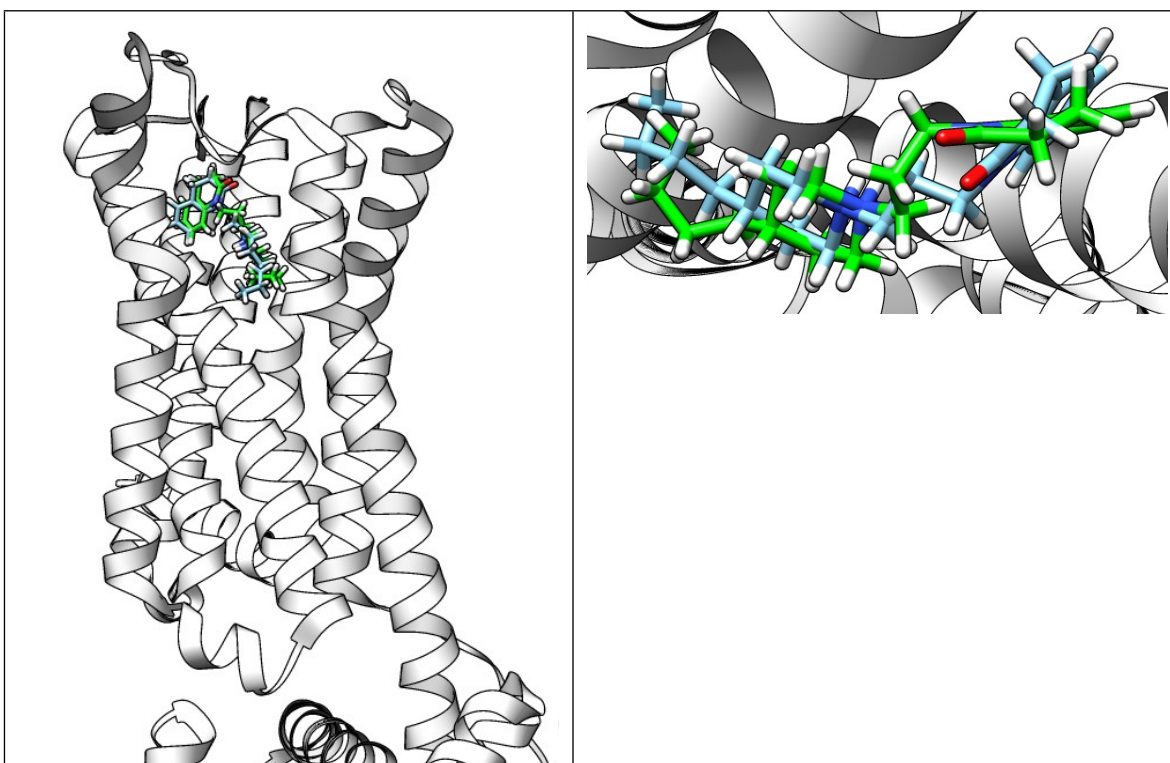

Figure-S4 Crystal structure of the M1R- 77-LH-28-1 complex (PDB:6ZFZ) with the overlapping ligand pose obtained from docking (RMSD=0.85 Å). The conformation obtained from the docking calculation is green, and the crystal conformation is cyan.

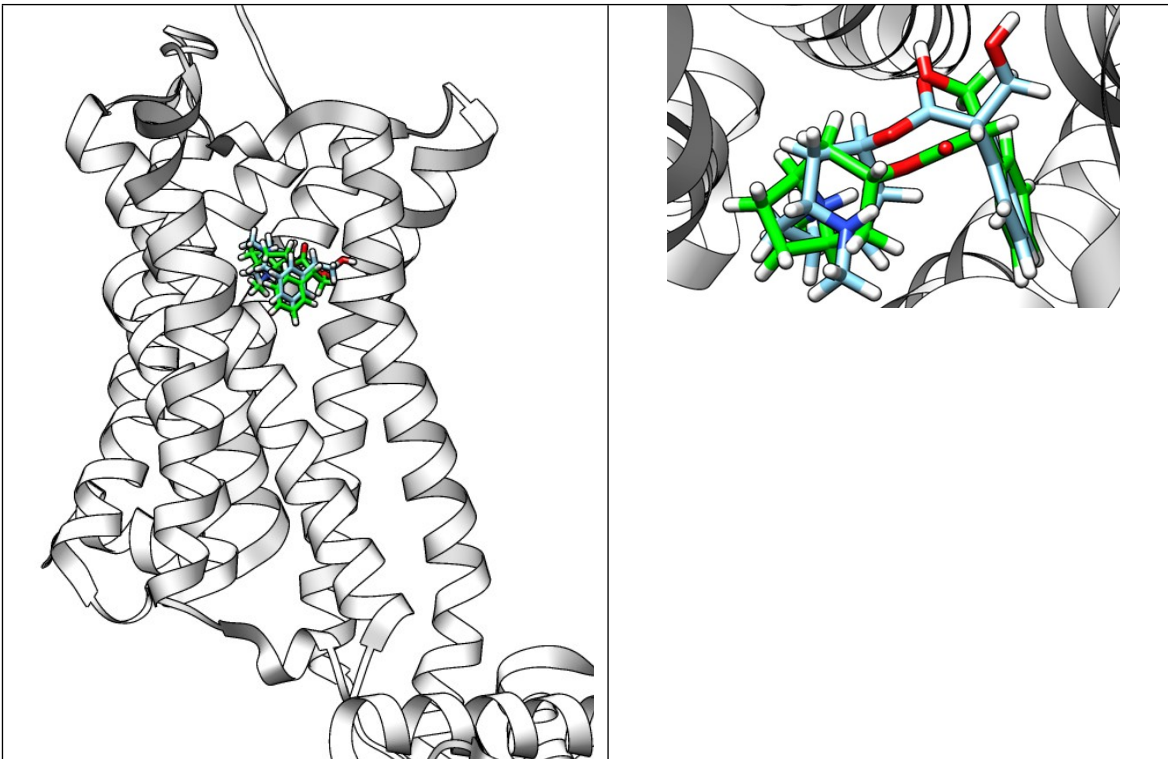

Figure-S5 Crystal structure of the M1R-atropine complex (PDB:6WJC) with the overlapping ligand pose obtained from docking (RMSD=1.2 Å). The conformation obtained from the docking calculation is green, and the crystal conformation is cyan.

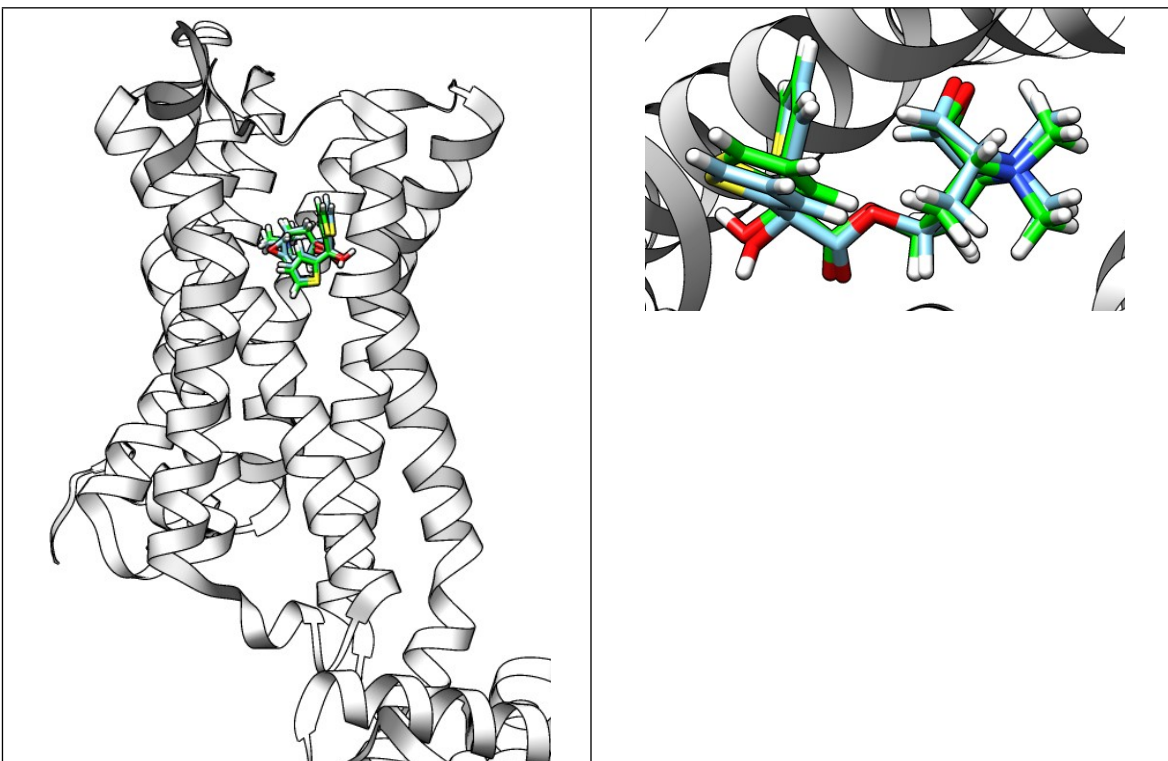

Figure-S6 Crystal structure of the M1R-tiotropium complex (PDB:5CXV) with the overlapping ligand pose obtained from docking (RMSD=0.29 Å). The conformation obtained from the docking calculation is green, and the crystal conformation is cyan.

Figure-S7 Molecular descriptors obtained from SwissADME and ChemDes.

| Descriptor Family            | Molecular descriptors                                                                                                                                                                                                                                                                                                                                                                                                                                                                                                                                                                                                                                                                                                                                                                                                                                                                                                                                                                                                                                                                                                                        | Web server |
|------------------------------|----------------------------------------------------------------------------------------------------------------------------------------------------------------------------------------------------------------------------------------------------------------------------------------------------------------------------------------------------------------------------------------------------------------------------------------------------------------------------------------------------------------------------------------------------------------------------------------------------------------------------------------------------------------------------------------------------------------------------------------------------------------------------------------------------------------------------------------------------------------------------------------------------------------------------------------------------------------------------------------------------------------------------------------------------------------------------------------------------------------------------------------------|------------|
| Physicochemical              | molecular weight, num. heavy atoms, fraction csp3, num. rotatable bonds, num. h-bond acceptors, num. h-bond donors, molar refractivity                                                                                                                                                                                                                                                                                                                                                                                                                                                                                                                                                                                                                                                                                                                                                                                                                                                                                                                                                                                                       | SwissADME  |
| Lipophilicity                | log po/w (ilogp), log po/w (xlogp3), log po/w (wlogp), log po/w (mlogp), log po/w (silicos-it), consensus log po/w                                                                                                                                                                                                                                                                                                                                                                                                                                                                                                                                                                                                                                                                                                                                                                                                                                                                                                                                                                                                                           | SwissADME  |
| Water Solubility             | log s (esol), log s (ali), log s (silicos-it), solubility, class                                                                                                                                                                                                                                                                                                                                                                                                                                                                                                                                                                                                                                                                                                                                                                                                                                                                                                                                                                                                                                                                             | SwissADME  |
| Pharmacokinetics             | gi absorption, bbb permeant, p-gp substrate, cyp1a2 inhibitor, cyp2c19 inhibitor, cyp2c9 inhibitor, cyp2d6 inhibitor, cyp3a4 inhibitor, log kp (skin permeation)                                                                                                                                                                                                                                                                                                                                                                                                                                                                                                                                                                                                                                                                                                                                                                                                                                                                                                                                                                             | SwissADME  |
| Druglikeness                 | lipinski, ghose, veber, egan, muegge, bioavailability score                                                                                                                                                                                                                                                                                                                                                                                                                                                                                                                                                                                                                                                                                                                                                                                                                                                                                                                                                                                                                                                                                  | SwissADME  |
| Medicinal Chemistry          | pains, brenk, leadlikeness, synthetic accessibility                                                                                                                                                                                                                                                                                                                                                                                                                                                                                                                                                                                                                                                                                                                                                                                                                                                                                                                                                                                                                                                                                          | SwissADME  |
| Constitutional               | molecular weight (not including h), count of hydrogen atoms, count of halogen atoms, count of hetero atoms, count of heavy atoms, count of atoms, count of cl atoms, count of br atoms, count of i atoms, count of c atoms, count of p atoms, count of s atoms, count of o atoms, count of n atoms, number of rings, number of rotatable bonds, number of h-bond donors, number of h-bond acceptors, number of single bonds, number of double bonds, number of triple bonds, number of aromatic bonds, number of all atoms, average molecular weight(not including h), molecular path counts of length 1-6 (pc1-pc6)                                                                                                                                                                                                                                                                                                                                                                                                                                                                                                                         | ChemDes    |
| Connectivity                 | valence molecular connectivity chi index for path order 0-10, 0xv, 1xv, 2xv, 3xpv, 4xpv, 5xpv, 6xpv, 7xpv, 8xpv, 9xpv, 10xpv, valence molecular connectivity chi index for three cluster, valence molecular connectivity chi index for four cluster, valence molecular connectivity chi index for path/cluster, valence molecular connectivity chi index for cycles of 3-6 (3xvch), 4xvch, 5xvch, 6xvch, simple molecular connectivity chi indices for path order 0-10, 0x, 1x, 2x, 3xp, 4xp, 5xp, 6xp, 7xp, 8xp, 9xp, 10xp, simple molecular connectivity chi indices for three cluster, simple molecular connectivity chi indices for four cluster, simple molecular connectivity chi indices for path/cluster, simple molecular connectivity chi indices for cycles of 3-6 (3xch), 4xch, 5xch, 6xch, mean chi1 (randic) connectivity index, the difference between chi3c and chi4pc, the difference between chi0v and chi0, the difference between chi1v and chi1, the difference between chi2v and chi2, the difference between chi3v and chi3, the difference between chi4v and chi4, the difference between chiv3c and chiv4pc         | ChemDes    |
| Basak                        | information content with order 0 proposed by basak, information content with order 1,2,3,4,5,6 proposed by basak, complementary information content with order 0 proposed by basak, structural information content with order 1, 2, 3, 4, 5, 6 proposed by basak, complementary information content with order 0, 1, 2, 3, 4, 5, 6 proposed by basak                                                                                                                                                                                                                                                                                                                                                                                                                                                                                                                                                                                                                                                                                                                                                                                         | ChemDes    |
| Topology                     | weiner index, average wiener index, balaban, harary number, schiultz index, graph distance index, platt number, xu index, polarity number, pogliani index, ipc index, bertzct, gutman molecular topological index based on simple vertex degree, zagreb index with order 1-2, modified zagreb index with order 1-2, quadratic index, largest value in the distance matrix, radius based on topology, petitjean based on topology, the logarithm of the simple topological index by narumi, harmonic topological index proposed by narumi, geometric topological index by narumi, arithmetic topological index by narumi, total information index on molecular size, total information index on atomic composition, total information index on distance equality, mean information index on distance equality, total information index on vertex equality, logarithm of the simple topological index by narumi, harmonic topological index proposed by narumi, geometric topological index by narumi, gravitational topological index based on topological distance, gutman molecular topological index based on valence vertex degree(log10) | ChemDes    |
| Kappa                        | kappa alpha index for 1 bonded fragment, kappa alpha index for 2 bonded fragment, kappa alpha index for 3 bonded fragment, kier molecular flexibility index, molecular shape kappa index for 1, 2 and 3 bonded fragment                                                                                                                                                                                                                                                                                                                                                                                                                                                                                                                                                                                                                                                                                                                                                                                                                                                                                                                      | ChemDes    |
| Burden                       | burden descriptors based on atomic mass, burden descriptors based on atomic volumes, burden descriptors based on atomic electronegativity, burden descriptors based on polarizability                                                                                                                                                                                                                                                                                                                                                                                                                                                                                                                                                                                                                                                                                                                                                                                                                                                                                                                                                        | ChemDes    |
| E-state                      | Sum of E-State of atom type S1, S2, S3, S4, S5, S6, S7, S8, S9, S10, S11, S12, S13, S14, S15, S16, S, 17, S18, S19, S20, S21, S22, S23, S24, S25, S26, S27, S28, S29, S30, S31, S32, S33, S34, S35, S36, S37, S38, S39, S40, S41, S42, S43, S44, S45, S46, S47, S48, S49, S50                                                                                                                                                                                                                                                                                                                                                                                                                                                                                                                                                                                                                                                                                                                                                                                                                                                                | ChemDes    |
| Moran                        | moran autocorrelation descriptors based on atom mass, van der waals volume, sanderson electronegativity, polarizability                                                                                                                                                                                                                                                                                                                                                                                                                                                                                                                                                                                                                                                                                                                                                                                                                                                                                                                                                                                                                      | ChemDes    |
| Geary                        | geary autocorrelation descriptors based on atom mass, van der waals volume, sanderson electronegativity, polarizability                                                                                                                                                                                                                                                                                                                                                                                                                                                                                                                                                                                                                                                                                                                                                                                                                                                                                                                                                                                                                      | ChemDes    |
| Molecular property           | molar refractivity, logp value based on the crippen method, square of logp value based on the crippen method, topological polarity surface area, unsaturation index, hydrophilic index                                                                                                                                                                                                                                                                                                                                                                                                                                                                                                                                                                                                                                                                                                                                                                                                                                                                                                                                                       | ChemDes    |
| Moreau-Broto autocorrelation | moreau-broto autocorrelation descriptors based on atom mass, atsm1, atsm2, atsm3 atsm4, atsm5, atsm6, atsm7, atsm8, moreau-broto autocorrelation descriptors based on atomic van der waals volume, atsv1, atsv2, atsv3, atsv4, atsv5, atsv6, atsv7, atsv8, moreau-broto autocorrelation descriptors based on atomic sanderson electronegativity, atse1, atse2, atse3, atse4, atse5, atse6, atse7, atse8, moreau-broto autocorrelation descriptors based on atomic polarizability, atsp1, atsp2, atsp3, atsp4, atsp5, atsp6, atsp7, atsp8                                                                                                                                                                                                                                                                                                                                                                                                                                                                                                                                                                                                     | ChemDes    |
| Charge                       | most positive charge on H atom, C atom, N atom, O atom, most negative charge on H atom, C atom, N atom, O atom, most positive charge in a molecule, most negative charge in a molecule, sum of squares of charges on H atom, C atom, N atom, O atom, sum of squares of charges on all atoms, mean of positive charges, total of positive charges, mean of negative charges, total of negative charges, mean of absolute charges, total of absolute charges, relative positive charge, Relative negative charge, submolecular polarity parameter, local dipole index                                                                                                                                                                                                                                                                                                                                                                                                                                                                                                                                                                          | ChemDes    |
| MOE-type                     | topological polar surface area based on fragments, labute's approximate surface area, moe-type descriptors using slogp and mr contributions and surface area contributions, moe-type descriptors using partial charges and surface area contributions, moe-type descriptors using estate indices and surface area contributions, moe-type descriptors using surface area contributions and estate indices                                                                                                                                                                                                                                                                                                                                                                                                                                                                                                                                                                                                                                                                                                                                    | ChemDes    |

Figure-S8 Data values of agonists of M1-AChR obtained from the QSAR model.

| Molecule | Name                       | Volume [Å <sup>3</sup> ] | Y Exp. | Y-Calc | Y-Pred | Err.Calc. | Err.Pred. |
|----------|----------------------------|--------------------------|--------|--------|--------|-----------|-----------|
| 1        | 77-LH-28-1                 | 379.5                    | 8.7    | 7.52   | 7.31   | -1.18     | -1.39     |
| 2        | NNC 11-1607                | 564.73                   | 8.6    | 8.66   | 9.01   | 0.06      | 0.41      |
| 3        | AZD6088                    | 416.01                   | 8.3    | 7.84   | 7.76   | -0.46     | -0.54     |
| 4        | SPP1                       | 454.12                   | 7.67   | 8.13   | 8.24   | 0.46      | 0.57      |
| 5        | AC-260584                  | 375.46                   | 7.39   | 7.48   | 7.49   | 0.09      | 0.1       |
| 6        | xanomeline                 | 299.97                   | 7.3    | 6.63   | 6.54   | -0.67     | -0.76     |
| 7        | sabcomeline                | 207.12                   | 6.7    | 5.3    | 5.21   | -1.4      | -1.49     |
| 8        | GSK-1034702                | 339.04                   | 6.5    | 7.1    | 7.19   | 0.6       | 0.69      |
| 9        | arecaidine propargyl ester | 202.15                   | 6.4    | 5.22   | 5.14   | -1.18     | -1.26     |
| 10       | oxotremorine               | 235.81                   | 5.75   | 5.74   | 5.74   | -0.01     | -0.01     |
| 11       | arecoline                  | 172.67                   | 5.7    | 4.72   | 4.61   | -0.98     | -1.09     |
| 12       | (-)-aceclidine             | 181.6                    | 5.4    | 4.87   | 4.83   | -0.53     | -0.57     |
| 13       | oxotremorine-M             | 229.41                   | 5.35   | 5.65   | 5.66   | 0.3       | 0.31      |
| 14       | cevimeline                 | 204.46                   | 5.3    | 5.25   | 5.25   | -0.05     | -0.05     |
| 15       | pilocarpine                | 222.06                   | 5.1    | 5.53   | 5.56   | 0.43      | 0.46      |
| 16       | McN-A-343                  | 291.67                   | 5      | 6.52   | 6.71   | 1.52 *    | 1.71 *    |
| 17       | milameline                 | 178.32                   | 4.8    | 4.82   | 4.82   | 0.02      | 0.02      |
| 18       | acetylcholine              | 171.6                    | 4.6    | 4.7    | 4.71   | 0.1       | 0.11      |
| 19       | methylfurmethide           | 185.82                   | 4.6    | 4.94   | 4.97   | 0.34      | 0.37      |
| 20       | (-)-YM796                  | 213.06                   | 4.55   | 5.39   | 5.44   | 0.84      | 0.89      |
| 21       | carbachol                  | 163.41                   | 4.25   | 4.56   | 4.6    | 0.31      | 0.35      |
| 22       | furtrethonium              | 167.71                   | 4.1    | 4.63   | 4.7    | 0.53      | 0.6       |
| 23       | bethanechol                | 181.39                   | 4      | 4.87   | 4.94   | 0.87      | 0.94      |

Figure-S9 Data values of antagonists of M1-AChR obtained from the QSAR model

| Molecule | Name                 | Volume [Å <sup>3</sup> ] | Y Exp. | Y-Calc | Y-Pred | Err.Calc. | Err.Pred. |
|----------|----------------------|--------------------------|--------|--------|--------|-----------|-----------|
| 1        | QNB                  | 358.4                    | 10.7   | 8.75   | 8.66   | -1.95     | -2.04     |
| 2        | tiotropium           | 395.12                   | 10.34  | 8.94   | 8.87   | -1.4      | -1.47     |
| 3        | N-methyl scopolamine | 330.56                   | 9.9    | 8.45   | 8.37   | -1.45     | -1.53     |
| 4        | glycopyrrolate       | 349.19                   | 9.85   | 8.67   | 8.61   | -1.18     | -1.24     |
| 5        | umeclidinium         | 475.09                   | 9.8    | 8.49   | 7.56   | -1.31     | -2.24     |
| 6        | propantheline        | 407.36                   | 9.7    | 8.94   | 8.89   | -0.76     | -0.81     |
| 7        | ipratropium          | 365.56                   | 9.55   | 8.81   | 8.78   | -0.74     | -0.77     |
| 8        | Telenzepine          | 372.03                   | 9.4    | 8.85   | 8.83   | -0.55     | -0.57     |
| 9        | 4-DAMP               | 362.79                   | 9.3    | 8.79   | 8.77   | -0.51     | -0.53     |
| 10       | Biperiden            | 354.08                   | 9.3    | 8.72   | 8.69   | -0.58     | -0.61     |
| 11       | atropine             | 309.15                   | 9.1    | 8.13   | 8.06   | -0.97     | -1.04     |
| 12       | Benzatropine         | 348.43                   | 9      | 8.66   | 8.65   | -0.34     | -0.35     |
| 13       | scopolamine          | 312.32                   | 9      | 8.18   | 8.13   | -0.82     | -0.87     |
| 14       | trihexyphenidyl      | 350.58                   | 8.9    | 8.68   | 8.67   | -0.22     | -0.23     |
| 15       | dicyclomine          | 363.83                   | 8.61   | 8.8    | 8.81   | 0.19      | 0.2       |
| 16       | oxybutynin           | 387.97                   | 8.45   | 8.92   | 8.94   | 0.47      | 0.49      |
| 17       | tolterodine          | 406.22                   | 8.4    | 8.94   | 8.98   | 0.54      | 0.58      |
| 18       | pirenzepine          | 360.26                   | 8.15   | 8.77   | 8.8    | 0.62      | 0.65      |
| 19       | amitriptyline        | 327.15                   | 7.8    | 8.41   | 8.44   | 0.61      | 0.64      |
| 20       | solifenacin          | 387.35                   | 7.8    | 8.92   | 8.97   | 1.12      | 1.17      |
| 21       | VU0255035            | 394.36                   | 7.8    | 8.94   | 8.99   | 1.14      | 1.19      |
| 22       | dosulepin            | 328.22                   | 7.7    | 8.42   | 8.46   | 0.72      | 0.76      |
| 23       | darifenacin          | 460.81                   | 7.65   | 8.66   | 9.06   | 1.01      | 1.41      |
| 24       | himbacine            | 393.32                   | 6.9    | 8.93   | 9.03   | 2.03 *    | 2.13      |
| 25       | (S)-dimetindene      | 340.13                   | 6.7    | 8.57   | 8.67   | 1.87      | 1.97      |
| 26       | AZD6088              | 416.01                   | 8.3    | 8.93   | 8.99   | 0.63      | 0.69      |
| 27       | Xanomeline           | 299.97                   | 7.3    | 7.96   | 8.01   | 0.66      | 0.71      |
| 28       | Oxotremorine-M       | 235.81                   | 5.75   | 6.38   | 6.45   | 0.63      | 0.7       |
| 29       | (-)-aceclidine       | 181.6                    | 5.4    | 4.46   | 4.05   | -0.94     | -1.35     |
| 30       | Pilocarpine          | 222.06                   | 5.1    | 5.94   | 6.07   | 0.84      | 0.97      |
| 31       | Milameline           | 178.32                   | 4.8    | 4.33   | 4.1    | -0.47     | -0.7      |
| 32       | (-)-YM796            | 213.06                   | 4.55   | 5.64   | 5.84   | 1.09      | 1.29      |

**Figure-S10. BIOVIA Discovery Studio Visualizer analysis. Comparative analysis of the interaction types and amino acids involved at M1AChR.**

Figure-S10.1 The crystal structure of the M1 receptor with iperexo bound (PDB code: 6OIJ) was used as a template to assess the different M1R-ligand interactions.

| Molecule                   | Hydrophobic contact                       |               |                   |        | Carbon Hydrogen Bond |        |        |        | Electrostatic |               | Distance (Å)               |
|----------------------------|-------------------------------------------|---------------|-------------------|--------|----------------------|--------|--------|--------|---------------|---------------|----------------------------|
|                            | Tyr404                                    | Tyr106        | Trp378            | Tyr381 | Tyr404               | Ser109 | Tyr106 | Asp382 | Asp105        | Tyr404        |                            |
| Iperoxo                    | Tyr404                                    | Tyr106        | Trp378            | Tyr381 | Tyr404               | Ser109 | Tyr106 | Asp382 | Asp105        | Tyr404        | Ser109 (2.9)               |
| (-)-aceclidine             | —                                         | —             | —                 | —      | ✓                    | ✓      | —      | —      | ✓             | ✓             | Ser109 (3)                 |
| (-)-YM796                  | Ala193, Ala196                            | Val113,Phe197 | ✓                 | —      | Tyr106               | —      | ✓      | —      | Tyr106        | —             | Tyr106 (2.5)               |
| 77-LH-28-1                 | Ala193, Val385,Trp157,Cys407              | ✓             | ✓                 | ✓      | —                    | —      | —      | ✓      | —             | —             | Asn382 (2.6),Trp157 (2.7)  |
| AC-42                      | Ala193,Val385,Leu183,Trp157,Phe182,Cys407 | ✓             | —                 | —      | —                    | ✓      | ✓      | Gln110 | —             | —             | Asn382 (2.9)               |
| AC-260584                  | Ala193,Val385,Trp157,Cys407               | ✓             | —                 | ✓      | —                    | ✓      | ✓      | ✓      | —             | —             | Ser109 (3), Trp157 (2.6)   |
| acetylcholine              | ✓                                         | ✓             | —                 | ✓      | Asp105               | ✓      | —      | —      | ✓, Tyr106     | ✓             | Trp157 (2.9)               |
| arecaidine propargyl ester | ✓                                         | ✓             | Cyst407           | ✓      | —                    | ✓      | ✓      | Tyr381 | —             | —             | Asn382 (3.2)               |
| arecoline                  | —                                         | ✓             | ✓                 | —      | —                    | Ala193 | ✓      | —      | —             | —             | Gln110 (2.3)               |
| AZD6088                    | —                                         | Tyr85         | Trp400            | —      | Glu397               | —      | —      | —      | —             | —             | Gln177 (2.8)               |
| bethanechol                | ✓                                         | ✓             | —                 | ✓      | —                    | ✓      | —      | —      | ✓             | Tyr106,Tyr381 | Gln110 (1.9),Trp157 (2.7)  |
| carbachol                  | ✓                                         | ✓             | —                 | —      | Asp105               | ✓      | —      | —      | ✓             | ✓, Tyr106     | Gln110 (2.9)               |
| cevimeline                 | Ala193,Ala196,Val385,Trp157               | —             | —                 | ✓      | Gln110               | —      | —      | —      | —             | —             | Gln110 (2.4)               |
| furtrethonium              | ✓                                         | ✓             | ✓                 | —      | —                    | ✓      | ✓      | Asp105 | ✓             | ✓, Tyr106     | Ser109 (3.1)               |
| GSK-1034702                | Trp400,Tyr179,Val395                      | —             | —                 | —      | Gln177               | —      | —      | —      | Glu397        | —             | Tyr179 (2.7)               |
| HTL9936                    | Tyr179, Leu86                             | —             | —                 | —      | Trp400               | —      | —      | —      | Glu397        | Tyr179        | Glu397 (2.9), Lys392 (1.9) |
| LY593093                   | Trp400,Tyr179,Glu397,Thr398,Leu86,Leu186  | —             | —                 | —      | Glu397               | —      | —      | —      | Glu397        | —             | Tyr85 (2.9)                |
| McN-A-343                  | ✓                                         | ✓             | Cyst407           | ✓      | Thr189               | ✓      | Tyr381 | ✓      | —             | —             | Gln110 (2.9)               |
| methylfurmethide           | ✓                                         | ✓             | Cyst407,Trp157    | ✓      | —                    | Gln110 | ✓      | —      | —             | —             | Gln110(3.2), Tyr106(3.4)   |
| milameline                 | —                                         | —             | —                 | —      | Gln110               | Ala196 | —      | —      | —             | —             | Gln110(3.4), Ala196(3.3)   |
| NNC 11-1585                | ✓                                         | —             | —                 | —      | Glu397               | Ser388 | —      | —      | Glu397        | —             | Gln177 (3.2)               |
| NNC 11-1607                | Trp400,Tyr179,Tyr85,Leu86                 | —             | —                 | —      | Glu397               | —      | —      | —      | Lys392        | Trp400        | Gly89 (1.8)                |
| oxotremorine               | ✓                                         | ✓             | —                 | —      | ✓                    | —      | ✓      | —      | —             | —             | Gln110 (1.9)               |
| oxotremorine-M             | ✓                                         | —             | —                 | —      | ✓                    | ✓      | —      | Gln110 | ✓             | ✓             | Ser109 (2.9)               |
| Pentylthio-TZTP            | ✓                                         | —             | Tyr85,Leu102      | —      | Glu397               | —      | —      | —      | Glu397        | Trp400        | Glu397 (2.9)               |
| pilocarpine                | ✓                                         | —             | ✓, Cyst407,Ala196 | ✓      | Asn382               | —      | —      | —      | —             | —             | Tyr404 (2.9)               |
| sabcomeline                | ✓                                         | —             | —                 | —      | Asn382               | —      | —      | —      | ✓             | ✓, Tyr106     | Gln110 (2.9)               |
| Xanomeline                 | Ala193,Ala196,Val385,Trp157,Phe182,Tyr381 | ✓             | —                 | ✓      | Asn382               | —      | —      | —      | Asp105        | Tyr106        | Ser109 (2.7)               |

| Figure-S10.1 Continue      |                |                   |          |        |        |        |                            |               |                |                |                    |                |             |                  |                |
|----------------------------|----------------|-------------------|----------|--------|--------|--------|----------------------------|---------------|----------------|----------------|--------------------|----------------|-------------|------------------|----------------|
| Molecule                   | Pi Cation      | Pi sigma          | Pi-Alkyl |        |        |        | Conventional Hydrogen Bond | Pi-Pi Stacked | Pi-Pi T-shaped | Pi anion       | Halogen (Fluorine) | Pi-Sulfur      | Salt Bridge | Amide-Pi Stacked |                |
| Iperoxo                    | Tyr404         | Tyr404            | —        | —      | —      | —      | —                          | —             | —              | —              | —                  | —              | —           | —                |                |
| (-)-aceclidine             | ✓              | —                 | —        | —      | —      | —      | —                          | —             | —              | —              | —                  | —              | —           | —                |                |
| (-)-YM796                  | Tyr106         | —                 | Phe197   | Trp378 | —      | —      | —                          | —             | —              | —              | —                  | —              | —           | —                |                |
| 77-LH-28-1                 | —              | —                 | Trp157   | Cys407 | —      | —      | Trp157                     | —             | Tyr106         | Tyr381, Trp378 | —                  | —              | —           | —                |                |
| AC-42                      | —              | Tyr106            | Trp157   | Cys407 | Phe182 | —      | Asn382                     | —             | Tyr106         | —              | —                  | —              | —           | —                |                |
| AC-260584                  | —              | —                 | Trp157   | Cys407 | —      | —      | Ser109                     | Trp157        | Tyr106         | Tyr381         | —                  | —              | —           | —                |                |
| acetylcholine              | ✓, Tyr106      | ✓, Tyr106, Tyr381 | —        | —      | —      | —      | Trp157                     | —             | —              | —              | —                  | —              | —           | —                |                |
| arecaidine propargyl ester | —              | Tyr106            | Tyr106   | Tyr381 | Tyr404 | —      | Asn382                     | —             | —              | —              | —                  | —              | —           | —                |                |
| arecoline                  | —              | —                 | —        | —      | —      | —      | Gln110                     | —             | —              | —              | —                  | —              | —           | —                |                |
| AZD6088                    | —              | Tyr85             | Trp400   | —      | —      | —      | Gln177                     | —             | —              | —              | —                  | —              | —           | —                |                |
| bethanechol                | Tyr106, Tyr381 | ✓, Tyr106, Tyr381 | —        | —      | —      | —      | Trp157                     | Gln110        | —              | —              | —                  | —              | —           | —                |                |
| carbachol                  | ✓, Tyr106      | ✓, Tyr106         | —        | —      | —      | —      | Gln110                     | —             | —              | —              | —                  | —              | —           | —                |                |
| cevimeline                 | —              | —                 | Trp157   | Tyr381 | —      | —      | Gln110                     | —             | —              | —              | —                  | —              | —           | —                |                |
| furtrethonium              | ✓, Tyr106      | ✓                 | —        | —      | —      | —      | —                          | —             | Tyr106         | Trp378         | —                  | —              | —           | —                |                |
| GSK-1034702                | —              | Trp400            | Trp400   | —      | —      | —      | Tyr179                     | —             | —              | Tyr179         | —                  | Ser388         | —           | Glu397           |                |
| HTL9936                    | Tyr179         | Tyr179            | —        | —      | —      | —      | Glu397                     | Lys392        | —              | —              | —                  | —              | —           | —                |                |
| LY593093                   | Lys392         | Trp400            | Leu86    | Leu183 | —      | —      | Tyr85                      | —             | Tyr179         | Trp400         | Glu397             | Leu183, Ser388 | —           | —                | Glu397, Thr398 |
| McN-A-343                  | —              | —                 | Tyr404   | Tyr381 | Cys407 | —      | Gln110                     | —             | Tyr106         | —              | —                  | —              | —           | —                |                |
| methylfurmethide           | —              | ✓, Trp157         | Tyr381   | Cys407 | —      | —      | —                          | —             | Tyr106         | —              | —                  | —              | —           | —                |                |
| milameline                 | —              | —                 | —        | —      | —      | —      | —                          | —             | —              | —              | —                  | —              | —           | —                |                |
| NNC 11-1585                | —              | —                 | —        | —      | —      | —      | Gln177                     | —             | —              | Tyr404         | Glu397             | —              | —           | —                |                |
| NNC 11-1607                | Lys392, Trp400 | —                 | Leu86    | —      | —      | —      | Gly89                      | —             | Tyr85          | Trp400, Tyr179 | —                  | —              | —           | —                |                |
| oxotremorine               | —              | —                 | —        | —      | —      | —      | Gln110                     | Cys407        | —              | —              | —                  | —              | —           | —                |                |
| oxotremorine-M             | ✓              | ✓                 | —        | —      | —      | —      | —                          | —             | —              | —              | —                  | —              | —           | —                |                |
| Pentylthio-TZTP            | Trp400         | Trp400            | Tyr404   | Tyr85  | —      | —      | Glu397                     | Tyr85         | —              | —              | Glu397             | —              | Trp400      | —                |                |
| pilocarpine                | —              | Tyr404, Tyr381    | Trp378   | Tyr381 | Ala196 | —      | Tyr408                     | —             | —              | —              | —                  | —              | —           | —                |                |
| sabcomeline                | ✓, Tyr106      | ✓                 | —        | —      | —      | —      | Gln110                     | —             | —              | —              | —                  | —              | —           | —                |                |
| Xanomeline                 | Tyr106         | Tyr106            | Trp157   | Tyr381 | Ala196 | Phe182 | Ser109                     | —             | —              | Trp157         | —                  | —              | —           | —                |                |



Figure-S10.2 The crystal structure of the M1 receptor with 77-LH-28-1 bound (PDB code: 6ZFZ) was used as a template to assess the different M1R-ligand interactions.

| Molecule                   | Hydrophobic contact |                       |        |        |        |       |        | Carbon Hydrogen Bond |        |   | Electrostatic |        | Distance (Å)              |
|----------------------------|---------------------|-----------------------|--------|--------|--------|-------|--------|----------------------|--------|---|---------------|--------|---------------------------|
|                            | Cys407              | Tyr381                | Trp378 | Tyr106 | Ser109 | Tyr82 | Tyr404 | Asp105               | —      | — | Asp105        | Tyr404 |                           |
| 77-LH-28-1                 | Cys407              | Tyr381                | Trp378 | Tyr106 | Ser109 | Tyr82 | Tyr404 | Asp105               | —      | — | Asp105        | Tyr404 | Asp105 (1.9)              |
| (-)-aceclidine             | —                   | —                     | —      | ✓      | —      | ✓     | ✓      | Ala101               | —      | — | ✓             | —      | Ala101(2.6)               |
| (-)-YM796                  | Tyr85               | —                     | —      | —      | —      | ✓     | —      | —                    | —      | — | ✓             | —      | —                         |
| AC-42                      | —                   | ✓                     | ✓      | ✓      | —      | ✓     | —      | —                    | —      | — | ✓             | ✓      | —                         |
| AC-260584                  | Trp157              | Ala101                | ✓      | ✓      | —      | —     | ✓      | Cys178               | —      | — | —             | ✓      | Asp105 (1.95)             |
| acetylcholine              | Tyr85               | —                     | —      | —      | —      | ✓     | —      | Cys178               | —      | — | Tyr85         | —      | Cys178 (3.7)              |
| arecaidine propargyl ester | —                   | —                     | —      | ✓      | —      | ✓     | ✓      | Ser78                | Tyr408 | — | ✓             | —      | Ser78 (3.5), Tyr408(3.5)  |
| arecoline                  | Unfavorable         |                       |        |        |        |       |        |                      |        |   |               |        |                           |
| AZD6088                    | Trp157              | Ala101,Leu102,Cys178, | —      | —      | —      | —     | —      | —                    | —      | — | ✓             | ✓      | Cys178 (2.4)              |
| bethanechol                | —                   | ✓                     | ✓      | ✓      | —      | —     | ✓      | Tyr381               | —      | — | ✓             | Tyr106 | Tyr381(3.5)               |
| carbachol                  | Tyr85               | —                     | —      | —      | —      | ✓     | —      | —                    | —      | — | Tyr85         | —      | Ser78 (2.9), Tyr408(2.3)  |
| cevimeline                 | Tyr85               | —                     | —      | —      | —      | ✓     | ✓      | —                    | —      | — | ✓             | —      | —                         |
| furtrethonium              | Cys178              | —                     | —      | —      | —      | ✓     | —      | Ser78                | —      | — | ✓             | —      | Ser78 (3.8)               |
| Iperoxo                    | —                   | —                     | —      | ✓      | —      | ✓     | ✓      | Ser78                | —      | — | ✓             | —      | Ser78 (3.7)               |
| LY593093                   | —                   | Trp400,Leu102         | —      | ✓      | —      | —     | ✓      | —                    | —      | — | ✓             | —      | Asp105 (2.3)              |
| McN-A-343                  | —                   | Ala101,Leu81,Phe77    | —      | ✓      | —      | ✓     | —      | ✓                    | Ser109 | — | ✓             | —      | Asp105 (3.3), Ser109(3.4) |
| methylfurmethide           | Tyr85               | Cys178                | —      | —      | —      | ✓     | ✓      | —                    | —      | — | ✓             | —      | —                         |
| milameline                 | —                   | —                     | —      | —      | —      | ✓     | ✓      | ✓                    | —      | — | —             | —      | Asp105 (3.5)              |
| NNC 11-1585                | ✓                   | —                     | —      | ✓      | —      | ✓     | ✓      | —                    | —      | — | —             | —      | —                         |
| NNC 11-1607                | Pro186              | —                     | —      | —      | —      | ✓     | ✓      | Tyr106               | —      | — | ✓             | —      | Tyr106(3.4)               |
| oxotremorine               | —                   | —                     | —      | ✓      | —      | ✓     | ✓      | —                    | —      | — | —             | —      | —                         |
| oxotremorine-M             | —                   | —                     | —      | ✓      | —      | ✓     | ✓      | Tyr408               | —      | — | ✓             | —      | Tyr408(3.7)               |
| Pentylthio-TZTP            | Tyr85               | Cys178,Trp91,Leu102   | —      | ✓      | —      | ✓     | ✓      | —                    | —      | — | ✓             | Tyr106 | Asp105 (2.2)              |
| pilocarpine                | Tyr85               | Ala101,Trp91,Leu102   | —      | ✓      | —      | ✓     | ✓      | Tyr408               | —      | — | —             | —      | Tyr408(3.3)               |
| sabcomeline                | —                   | —                     | —      | —      | —      | ✓     | ✓      | Tyr106               | —      | — | —             | —      | Tyr106(3.6)               |
| xanomeline                 | Tyr85               | Cys178,Trp91          | —      | ✓      | —      | ✓     | ✓      | —                    | —      | — | ✓             | Tyr381 | —                         |
| GSK-1034702                | Tyr85               | —                     | —      | —      | —      | —     | ✓      | Tyr179               | —      | — | ✓             | —      | Tyr179(2.8)               |
| HTL9936                    | —                   | ✓                     | ✓      | ✓      | —      | —     | ✓      | ✓                    | —      | — | —             | ✓      | Asp105 (2.4)              |



Figure-S10.3 The crystal structure of the M1 receptor with atropine bound (PDB code: 6WJC) was used as a template to assess the different M1R-ligand interactions.

| Molecule             | Hydrophobic contact |        |               |        |                      |        | Carbon Hydrogen Bond |        |        | Electrostatic |                | Distance (Å)                             |
|----------------------|---------------------|--------|---------------|--------|----------------------|--------|----------------------|--------|--------|---------------|----------------|------------------------------------------|
|                      | Val113              | Ala196 | Tyr381        | Tyr106 | Ser109               | Tyr404 | Asp105               | Thr192 | —      | Asp105        | Trp378         |                                          |
| atropine             | Val113              | Ala196 | Tyr381        | Tyr106 | Ser109               | Tyr404 | Asp105               | Thr192 | —      | Asp105        | Trp378         | Asn382 (2.4), Ser109 (3.1)               |
| (S)-dimetindene      | —                   | ✓      | Trp378,Cys407 | —      | —                    | ✓      | Ala196               | —      | —      | —             | —              | Thr192 (2.2)                             |
| 4-DAMP               | Val385              | ✓      | ✓             | ✓      | Ala193               | ✓      | ✓                    | Tyr404 | —      | ✓             | Tyr404         | Asn382 (2.4)                             |
| acridinium           | Trp378              | Leu183 | ✓             | ✓      | —                    | —      | —                    | —      | —      | —             | —              | Tyr381(2.3)                              |
| AFDX384              | Trp400              | ✓      | —             | ✓      | —                    | ✓      | Tyr404               | Tyr106 | —      | Glu401        | —              | Asn382 (2.4), Cys 407 (2.7)              |
| amitriptyline        | Trp378              | ✓      | ✓             | —      | Ala193               | —      | —                    | —      | —      | —             | —              | Asp105(2.2)                              |
| AQ-RA 741            | ✓                   | ✓      | ✓             | ✓      | Trp378               | ✓      | Ala193               | Asp382 | —      | —             | —              | Ala193(2.6),Asn382(2.9)                  |
| Benzatropine         | —                   | ✓      | ✓             | ✓      | Ala193               | —      | ✓                    | —      | —      | ✓             | ✓              | Ser109 (2.6)                             |
| Biperiden            | Val385              | ✓      | ✓             | ✓      | Ala193               | ✓      | —                    | —      | —      | Trp378        | Tyr381         | —                                        |
| darifenacin          | ✓                   | ✓      | —             | ✓      | —                    | ✓      | —                    | —      | —      | —             | —              | Asn382 (1.8), Thr192 (1.9)               |
| dicyclomine          | ✓                   | ✓      | Trp378        | ✓      | Ala193               | ✓      | ✓                    | Ser109 | —      | ✓             | Tyr404         | Asn382 (2.5)                             |
| dosulepin            | Trp378              | ✓      | —             | —      | Ala193               | ✓      | —                    | —      | —      | ✓             | Tyr404         | —                                        |
| droxidopa            | —                   | ✓      | ✓             | ✓      | —                    | —      | —                    | —      | —      | ✓             | Asn382, Thr192 | Asn382 (2.5), Asp105 (2.6), Thr192 (2.8) |
| glycopyrrolate       | ✓                   | ✓      | —             | ✓      | Trp378               | ✓      | ✓                    | Tyr404 | Ser109 | ✓             | Tyr404         | Asn382 (2.4)                             |
| himbacine            | Trp378              | —      | ✓             | ✓      | Cys407               | ✓      | —                    | —      | —      | —             | —              | —                                        |
| ipratropium          | —                   | ✓      | —             | ✓      | Tyr408               | ✓      | —                    | —      | —      | ✓             | —              | —                                        |
| N-methyl scopolamine | —                   | ✓      | —             | ✓      | —                    | ✓      | —                    | —      | Tyr404 | ✓             | Tyr404         | Tyr404(3.2)                              |
| oxybutynin           | —                   | ✓      | ✓             | ✓      | Ala193               | ✓      | ✓                    | —      | —      | —             | —              | Asn382 (2.2), Ser109 (2.6)               |
| pirenzepine          | —                   | ✓      | ✓             | ✓      | Ala193,Val385,Tyr408 | ✓      | —                    | Ser109 | —      | ✓             | Tyr404,Tyr408  | Asn382 (2)                               |
| propantheline        | —                   | ✓      | ✓             | ✓      | Ala193,Tyr408        | ✓      | —                    | —      | —      | ✓             | Tyr404         | Asn382 (1.9)                             |
| QNB                  | Trp378              | ✓      | ✓             | ✓      | Ala193               | —      | —                    | —      | —      | ✓             | —              | Asn382 (2.5)                             |
| revefenacin          | —                   | ✓      | —             | ✓      | —                    | —      | Thr189               | ✓      | Cys178 | —             | —              | Asn382 (2.8), Thr192(2.1), Glu401 (2.2)  |
| scopolamine          | ✓                   | ✓      | ✓             | ✓      | —                    | —      | —                    | ✓      | —      | ✓             | ✓              | Asn382 (2.3), Tyr408 (2.7)               |
| solifenacin          | —                   | ✓      | —             | ✓      | Ala193               | —      | —                    | Asn382 | —      | —             | Tyr404         | Asn382 (2.6)                             |
| Telenzepine          | ✓                   | ✓      | ✓             | ✓      | Ala193,Trp378,Tyr408 | —      | —                    | Ser109 | —      | ✓             | Tyr408         | Asn382 (1.9)                             |
| tiotropium           | —                   | ✓      | ✓             | ✓      | Trp157,Ala193        | ✓      | Ala193               | Tyr404 | —      | ✓             | Tyr404,Tyr381  | Asn382 (2.4)                             |
| tolterodine          | —                   | ✓      | —             | ✓      | Cys407,Trp378,Tyr408 | ✓      | Asn382               | —      | —      | —             | —              | Asn382 (3.4)                             |
| trihexyphenidyl      | ✓                   | ✓      | ✓             | ✓      | Ala193,Trp378        | ✓      | —                    | —      | —      | —             | ✓              | —                                        |
| umeclidinium         | ✓                   | ✓      | —             | ✓      | Cys407,Ile180        | —      | —                    | —      | —      | —             | —              | Asn382(3)                                |
| VU0255035            | —                   | —      | ✓             | ✓      | —                    | ✓      | Tyr381               | ✓      | Glu401 | —             | —              | Tyr106(2.4),Thr192(2.7)                  |

Figure-S10.3 Continue

| Molecule             | Pi Cation     | Pi sigma             | Pi-Alkyl |        |               | Conventional Hydrogen Bond |        |        | Pi-Pi Stacked | Pi-Pi T-shaped | Pi anion | Pi-Sulfur     | Pi lone pair |
|----------------------|---------------|----------------------|----------|--------|---------------|----------------------------|--------|--------|---------------|----------------|----------|---------------|--------------|
|                      |               |                      | Val113   | Ala196 | —             | Asn382                     | Ser109 | —      |               |                |          |               |              |
| atropine             | Trp378        | —                    | Val113   | Ala196 | —             | Asn382                     | Ser109 | —      | —             | —              | —        | —             |              |
| (S)-dimetindene      | —             | Trp378               | Cys407   | ✓      | —             | Thr192                     | —      | —      | —             | Trp378,Tyr404  | —        | —             |              |
| 4-DAMP               | Tyr404        | Tyr106, Tyr404       | Val385   | ✓      | Ala193        | ✓                          | —      | —      | —             | Tyr381         | —        | —             |              |
| acridinium           | —             | —                    | Leu183   | —      | —             | Tyr381                     | —      | —      | —             | Trp378,Tyr381  | —        | Cys407        |              |
| AFDX384              | —             | —                    | Trp400   | ✓      | Tyr404        | ✓                          | Cys407 | —      | —             | Tyr106         | —        | Cys407        |              |
| amitriptyline        | —             | —                    | —        | ✓      | Ala193        | —                          | —      | —      | —             | Trp378,Tyr381  | —        | —             |              |
| AQ-RA 741            | —             | —                    | ✓        | ✓      | —             | —                          | —      | —      | —             | Trp378         | —        | Cys407        |              |
| Benzatropine         | ✓             | —                    | —        | ✓      | Ala193        | ✓                          | —      | —      | —             | Tyr381         | —        | —             |              |
| Biperiden            | ✓, Tyr381     | Tyr404               | Val385   | Ala193 | —             | —                          | —      | —      | —             | Tyr381         | —        | —             |              |
| darifenacin          | —             | —                    | ✓        | ✓      | Tyr404        | ✓                          | Thr192 | —      | Tyr106        | —              | —        | —             |              |
| dicyclomine          | Tyr404        | Tyr106, Tyr404       | Trp378   | —      | —             | ✓                          | —      | —      | —             | —              | —        | —             |              |
| dosulepin            | Tyr404        | Tyr404               | Ala193   | ✓      | —             | —                          | —      | —      | —             | Trp378         | —        | Trp378        |              |
| droxidopa            | —             | —                    | —        | —      | —             | ✓                          | Thr192 | Asp105 | Tyr106        | —              | —        | —             |              |
| glycopyrrolate       | Tyr404        | Trp378               | ✓        | ✓      | Tyr106        | ✓                          | —      | —      | —             | Trp378         | —        | —             |              |
| himbacine            | —             | —                    | Trp378   | Tyr404 | Tyr381        | —                          | —      | —      | —             | —              | —        | —             |              |
| ipratropium          | —             | Tyr404,Tyr408        | —        | ✓      | —             | —                          | —      | —      | —             | —              | —        | —             |              |
| N-methyl scopolamine | Tyr404        | Tyr404               | —        | ✓      | —             | —                          | —      | —      | —             | —              | —        | —             |              |
| oxybutynin           | —             | Tyr404               | —        | Ala193 | —             | ✓                          | ✓      | —      | —             | Tyr381         | —        | —             |              |
| pirenzepine          | Tyr404,Tyr408 | Tyr404,Tyr408        | Val385   | ✓      | Ala193        | ✓                          | —      | —      | —             | Tyr381         | —        | —             |              |
| propantheline        | Tyr404        | Tyr404,Tyr408,Tyr106 | —        | ✓      | Ala193        | ✓                          | —      | —      | —             | Tyr381         | —        | —             |              |
| QNB                  | Tyr404        | Trp378               | —        | ✓      | Ala193        | ✓                          | —      | —      | —             | Trp378,Tyr381  | —        | —             |              |
| revefenacin          | —             | —                    | —        | ✓      | —             | ✓                          | Thr192 | Glu401 | Tyr106        | Tyr106         | —        | —             |              |
| scopolamine          | ✓             | —                    | ✓        | ✓      | —             | ✓                          | Tyr408 | —      | —             | —              | —        | —             |              |
| solifenacin          | Tyr404        | —                    | Ala193   | ✓      | —             | ✓                          | —      | —      | —             | —              | —        | —             |              |
| Telenzepine          | Tyr408        | Trp378,Tyr408        | ✓        | ✓      | Ala193        | ✓                          | —      | —      | —             | Trp378,Tyr381  | —        | Trp378        |              |
| tiotropium           | Tyr404,Tyr381 | Tyr404               | —        | ✓      | Ala193        | ✓                          | —      | —      | Trp157        | Tyr381         | —        | Trp378,Tyr381 |              |
| tolterodine          | —             | —                    | Cys407   | ✓      | Trp378,Tyr408 | Tyr106                     | —      | —      | —             | Tyr106,Ty404   | —        | —             |              |
| trihexyphenidyl      | ✓             | Tyr404               | ✓        | ✓      | Tyr381        | —                          | —      | —      | —             | Trp378         | —        | —             |              |
| umeclidinium         | —             | —                    | ✓        | ✓      | Cys407,Ile180 | Asn382                     | —      | —      | —             | —              | —        | —             |              |
| VU0255035            | —             | —                    | —        | —      | Tyr404        | Tyr106                     | Thr192 | —      | Tyr404        | Tyr381         | —        | Tyr381        |              |

Figure-S10.4 The crystal structure of the M1 receptor with tiotropium bound (PDB code: 5CXV) was used as a template to assess the different M1R-ligand interactions.

| Molecule             | Hydrophobic contact |        |        |        |        |                             | Carbon Hydrogen Bond |        |        | Electrostatic |        |        | Distance (Å) |                            |
|----------------------|---------------------|--------|--------|--------|--------|-----------------------------|----------------------|--------|--------|---------------|--------|--------|--------------|----------------------------|
|                      | Tyr404              | Tyr106 | Tyr381 | Ala196 | Ala193 | Other                       | Tyr404               | —      | —      | Tyr404        | Asp105 | Other  | Asn382 (2)   | —                          |
| tiotropium           | ✓                   | ✓      | —      | —      | ✓      | Cys407                      | —                    | —      | —      | —             | —      | —      | —            | —                          |
| (S)-dimetindene      | ✓                   | ✓      | —      | —      | ✓      | Trp378,Val113               | —                    | —      | Ser109 | ✓             | ✓      | Tyr106 | Asn382 (2)   | —                          |
| 4-DAMP               | —                   | ✓      | —      | ✓      | ✓      | Trp378,Val113               | —                    | —      | Ser109 | ✓             | ✓      | Tyr106 | Asn382 (2)   | —                          |
| acridinium           | ✓                   | ✓      | ✓      | —      | —      | Ile180,Leu183,Val385,Cys407 | —                    | Asp382 | —      | —             | —      | —      | Asn382(3.7)  | —                          |
| AFDX384              | ✓                   | —      | ✓      | ✓      | —      | Ty82,Trp101                 | —                    | Tyr106 | —      | —             | —      | —      | Asn382 (2)   | Tyr381 (2.8), Thr189 (2.7) |
| amitriptyline        | ✓                   | ✓      | —      | ✓      | —      | Trp378,Val113,Cys407        | —                    | —      | —      | —             | —      | —      | —            | Thr189 (2.5)               |
| AQ-RA 741            | —                   | ✓      | —      | ✓      | ✓      | Trp400,Ile180               | —                    | Tyr106 | —      | —             | —      | Tyr106 | —            | Tyr106(2.9)                |
| atropine             | ✓                   | ✓      | —      | ✓      | —      | —                           | —                    | Asp105 | —      | ✓             | ✓      | Tyr106 | —            | Asp105(3.2)                |
| Benzatropine         | —                   | —      | —      | ✓      | ✓      | Trp378,Val113               | —                    | —      | —      | —             | ✓      | Trp378 | —            | —                          |
| Biperiden            | ✓                   | —      | ✓      | ✓      | ✓      | —                           | —                    | —      | —      | —             | —      | Trp378 | —            | —                          |
| darifenacin          | —                   | —      | —      | —      | —      | Trp400,Leu86                | Cys178               | —      | —      | ✓             | —      | Glu401 | —            | Trp400 (2.2)               |
| dicyclomine          | —                   | ✓      | —      | ✓      | ✓      | Trp378                      | —                    | —      | —      | —             | ✓      | Trp378 | —            | Tyr106(2.9)                |
| dosulepin            | —                   | ✓      | —      | ✓      | —      | Trp378,Tyr381               | —                    | —      | —      | —             | —      | —      | —            | Thr189 (2.3)               |
| droxidopa            | —                   | —      | —      | ✓      | —      | —                           | —                    | —      | —      | —             | —      | —      | Thr189(2.2)  | Thr192 (2.5), Tyr106 (3)   |
| glycopyrrolate       | —                   | ✓      | —      | ✓      | —      | Trp378,Val113               | ✓                    | Asp105 | Ser109 | ✓             | ✓      | —      | Asn382 (2.2) | —                          |
| himbacine            | —                   | —      | —      | —      | —      | Trp400                      | Tyr85                | —      | Cys178 | —             | —      | —      | Tyr85(3.7)   | Cys178(3.5)                |
| ipratropium          | —                   | —      | —      | ✓      | —      | —                           | —                    | —      | —      | —             | —      | Tyr106 | Thr192(2.3)  | —                          |
| N-methyl scopolamine | ✓                   | —      | ✓      | ✓      | —      | —                           | ✓                    | —      | Ala193 | ✓             | —      | Tyr381 | Tyr404(3.6)  | Ala193(3)                  |
| oxybutynin           | ✓                   | ✓      | ✓      | ✓      | —      | Cys407                      | —                    | —      | Ala193 | —             | —      | —      | Asn382 (3)   | Tyr106(2.2)                |
| pirenzepine          | ✓                   | —      | —      | —      | —      | —                           | Ser184               | Glu401 | Leu183 | —             | —      | Trp400 | Glu401(2.2)  | Leu183(3.6),Ser184(3.5)    |
| propantheline        | ✓                   | ✓      | ✓      | ✓      | ✓      | —                           | —                    | Asp382 | —      | —             | —      | —      | Asn382 (1.9) | —                          |
| QNB                  | —                   | ✓      | —      | ✓      | —      | Trp378,Val113               | —                    | —      | —      | —             | ✓      | —      | Asn382 (2.3) | —                          |
| revefenacin          | —                   | —      | —      | —      | —      | Trp400,Tyr404,Leu86,Leu183  | —                    | —      | Pro186 | —             | —      | Glu401 | Cys178(2.6)  | —                          |
| scopolamine          | ✓                   | —      | —      | ✓      | —      | Trp378                      | ✓                    | —      | —      | ✓             | —      | Tyr381 | Thr192(2.7)  | —                          |
| solifenacin          | ✓                   | ✓      | —      | ✓      | ✓      | Trp378,Trp157               | —                    | —      | —      | —             | ✓      | —      | Asn382 (2.5) | Ser109(2-5)                |
| Telenzepine          | ✓                   | —      | —      | —      | —      | Trp400                      | —                    | —      | Glu401 | —             | —      | Glu401 | Ile180(3)    | —                          |
| tolterodine          | ✓                   | —      | —      | ✓      | —      | Trp378                      | —                    | —      | —      | —             | —      | —      | —            | —                          |
| trihexyphenidyl      | —                   | —      | —      | ✓      | ✓      | Trp378                      | —                    | —      | —      | ✓             | ✓      | Tyr106 | —            | —                          |
| umeclidinium         | —                   | ✓      | —      | ✓      | —      | Thr189,Trp378,Val113,Pro186 | Tyr106               | —      | —      | —             | —      | —      | Tyr381 (2.2) | —                          |
| VU0255035            | ✓                   | ✓      | —      | ✓      | ✓      | —                           | —                    | —      | —      | —             | —      | —      | Tyr381 (2.2) | —                          |

Figure-S10.4 Continue

| Molecule             | Pi Cation | Pi sigma |               | Pi-Alkyl      |                      |               | Conventional Hydrogen Bond |               |        | Pi-Pi Stacked | Pi-Pi T-shaped |        | Sulfur-X | Pi-Sulfur |        |        | Pi anion |
|----------------------|-----------|----------|---------------|---------------|----------------------|---------------|----------------------------|---------------|--------|---------------|----------------|--------|----------|-----------|--------|--------|----------|
|                      |           | Tyr381   | Tyr404        | Ala196        | Ala193               | —             | Asn382                     | —             | —      |               | —              | —      |          | —         | Trp378 | Tyr381 |          |
| tiotropium           | Tyr404    | Tyr381   | Tyr404        | Ala196        | Ala193               | —             | Asn382                     | —             | —      | —             | —              | —      | Thr192   | Trp378    | Tyr381 | Phe197 | —        |
| (S)-dimetindene      | —         | —        | —             | —             | ✓                    | Cys407        | —                          | —             | —      | Tyr404,Tyr106 | —              | —      | —        | —         | —      | —      | —        |
| 4-DAMP               | ✓, Tyr106 | —        | Tyr106        | ✓             | ✓                    | Val113        | ✓                          | —             | —      | —             | Trp378         | —      | —        | —         | —      | —      | —        |
| acridinium           | —         | —        | —             | Cys407,Val385 | Ile180               | Leu183        | ✓                          | —             | —      | Tyr404,Tyr106 | Tyr381         | —      | —        | —         | —      | —      | —        |
| AFDX384              | —         | —        | —             | ✓             | Tyr404,Tyr82         | Trp101        | ✓                          | Tyr381,Thr189 | Tyr381 | Tyr381        | —              | —      | —        | Cys407    | —      | —      | —        |
| amitriptyline        | —         | —        | Trp378        | ✓             | Trp378,Cys407,Val113 | Ala193        | —                          | Thr189        | —      | Tyr404,Tyr106 | Trp378         | Tyr381 | —        | —         | —      | —      | —        |
| AQ-RA 741            | Tyr106    | —        | Tyr106        | —             | Ile180               | —             | —                          | —             | —      | Trp400        | —              | —      | —        | —         | —      | —      | —        |
| atropine             | ✓, Tyr106 | —        | ✓             | ✓             | —                    | —             | —                          | —             | —      | —             | —              | —      | —        | —         | —      | —      | —        |
| Benzatropine         | Trp378    | —        | —             | ✓             | ✓                    | Val113        | —                          | —             | —      | —             | Trp378         | —      | —        | —         | —      | —      | —        |
| Biperiden            | Trp378    | —        | ✓             | —             | ✓                    | —             | —                          | —             | —      | —             | Tyr381         | —      | —        | —         | —      | —      | —        |
| darifenacin          | ✓         | —        | —             | —             | Trp400,Leu86         | —             | —                          | Trp400        | —      | —             | —              | —      | —        | —         | —      | —      | Glu401   |
| dicyclomine          | Trp378    | —        | Tyr106        | —             | —                    | Trp378        | —                          | Tyr106        | —      | —             | —              | —      | —        | —         | —      | —      | —        |
| dosulepin            | —         | —        | —             | ✓             | —                    | Trp378        | —                          | Thr189        | —      | Tyr381        | Tyr106         | Trp378 | —        | Cys407    | —      | —      | —        |
| droxidopa            | —         | —        | —             | ✓             | —                    | —             | —                          | Thr189,Thr192 | Tyr106 | —             | —              | Trp378 | —        | —         | —      | —      | —        |
| glycopyrrolate       | ✓         | —        | —             | ✓             | Val113,Tyr106        | —             | ✓                          | —             | —      | —             | —              | Trp378 | —        | —         | —      | —      | —        |
| himbacine            | —         | —        | —             | —             | —                    | Trp400        | —                          | —             | —      | —             | —              | —      | —        | —         | —      | —      | —        |
| ipratropium          | Tyr106    | —        | —             | ✓             | —                    | —             | —                          | Thr192        | —      | —             | —              | —      | —        | —         | —      | —      | —        |
| N-methyl scopolamine | ✓, Tyr381 | ✓        | ✓             | ✓             | —                    | —             | —                          | —             | —      | —             | —              | —      | —        | —         | —      | —      | —        |
| oxybutynin           | —         | —        | —             | ✓             | Tyr106,Tyr381,Tyr404 | —             | ✓                          | —             | Tyr106 | —             | —              | —      | —        | —         | —      | —      | —        |
| pirenzepine          | Trp400    | —        | —             | —             | —                    | —             | —                          | —             | —      | Tyr404        | —              | —      | —        | —         | —      | —      | —        |
| propantheline        | —         | ✓        | ✓, Tyr106     | ✓             | ✓                    | —             | ✓                          | —             | —      | —             | —              | —      | —        | —         | —      | —      | —        |
| QNB                  | ✓         | —        | —             | ✓             | —                    | Val113        | ✓                          | —             | —      | —             | Tyr106         | Trp378 | —        | —         | —      | —      | —        |
| revefenacin          | —         | —        | —             | —             | Leu86,Leu186         | —             | —                          | Pro186,Cys178 | —      | —             | —              | Trp400 | —        | —         | —      | —      | Glu401   |
| scopolamine          | ✓         | ✓        | ✓             | ✓             | —                    | —             | Tyr404                     | Thr192        | —      | —             | Trp378         | —      | —        | —         | —      | —      | —        |
| solifenacin          | —         | —        | ✓             | ✓             | ✓                    | —             | ✓                          | —             | Ser109 | Tyr106,Trp157 | —              | Trp378 | —        | —         | —      | —      | —        |
| Telenzepine          | —         | —        | —             | —             | —                    | —             | —                          | —             | Ile180 | Tyr404        | Trp400         | —      | —        | Trp400    | —      | —      | —        |
| tolterodine          | —         | —        | —             | ✓             | —                    | —             | —                          | —             | —      | —             | Tyr404         | Trp378 | —        | Cys407    | —      | —      | —        |
| trihexyphenidyl      | ✓, Tyr106 | —        | —             | ✓             | —                    | —             | —                          | —             | —      | —             | Trp378         | —      | —        | —         | —      | —      | —        |
| umeclidinium         | —         | —        | Thr189,Trp378 | ✓             | —                    | Val113,Pro186 | —                          | —             | Tyr381 | Trp378        | ✓              | Trp378 | —        | Cys407    | —      | —      | —        |
| VU0255035            | —         | —        | —             | ✓             | —                    | Tyr106        | —                          | —             | Tyr381 | Tyr404        | —              | —      | —        | —         | —      | —      | —        |

Figure-S11. Scatterplots of predicted pKi values against experimental pKi values, and Williams plots for agonists of M1-AChR.

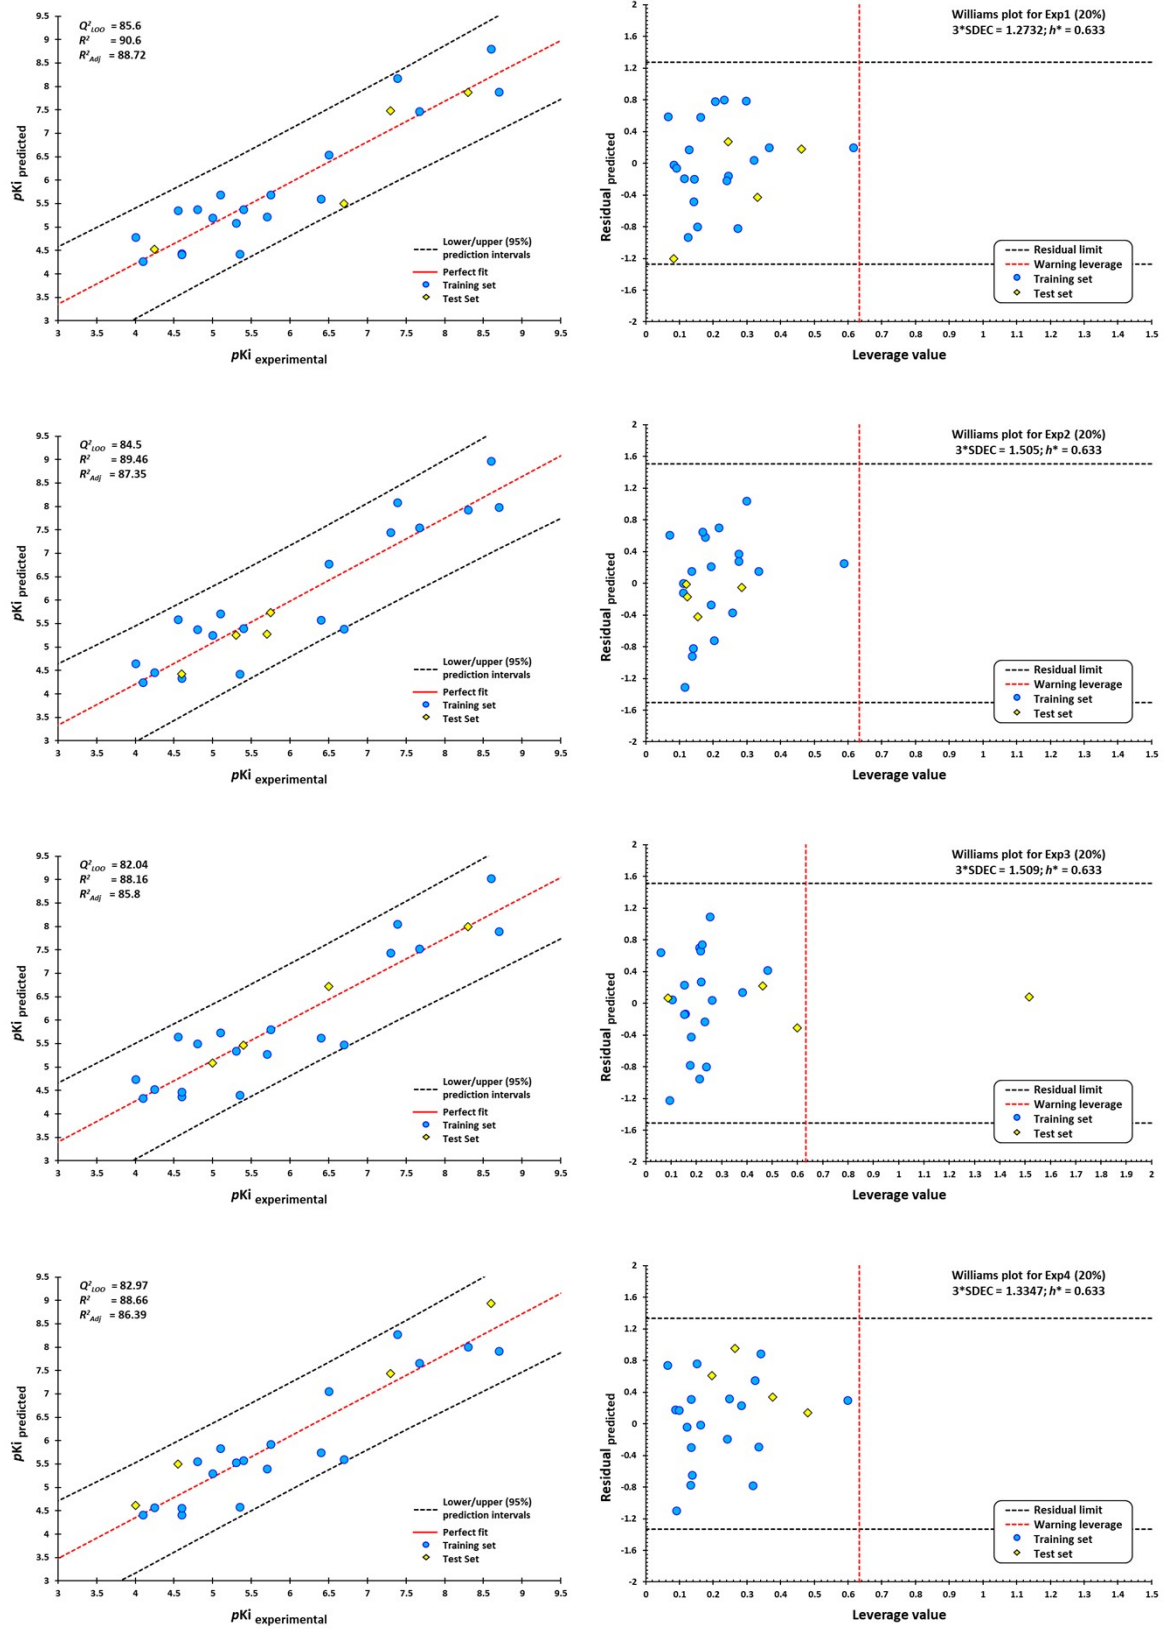

Figure-S12. Scatterplots of predicted pKi values against experimental pKi values, and Williams plots for antagonists of M1-AChR.

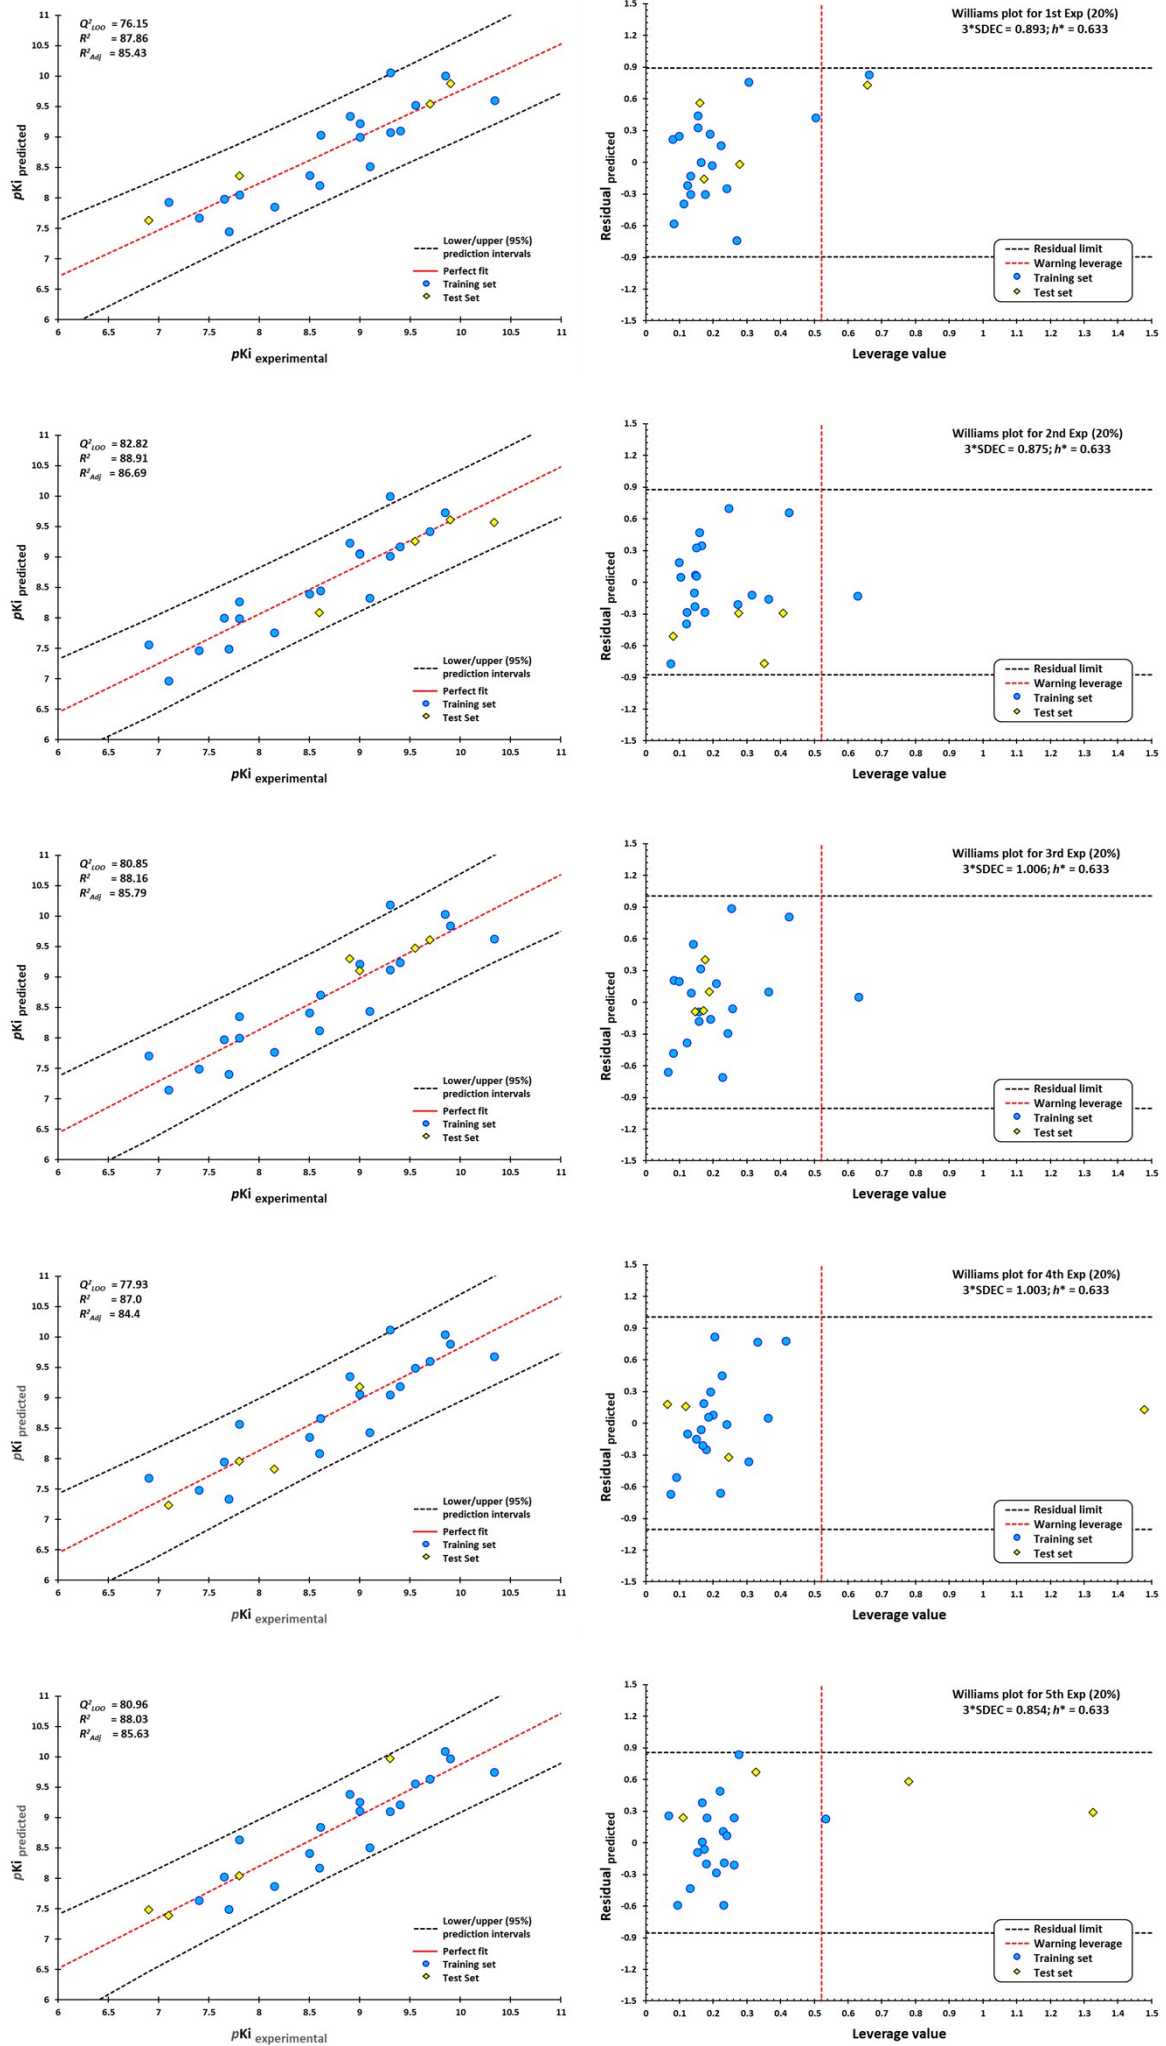

Supplement: d3ra07380g1.pdf [file d3ra07380g1.pdf]
